# Supplementary material
Source: PubMed Central journal article supplement (PMC7749993)
Supplement: mmc1.pdf [file mmc1.pdf]

# Determining the anxiety states of physicians and nurses regarding COVID-19

The aim of this study is to determine the anxiety status of PHYSICIANS AND NURSES for COVID-19. The data will be used for scientific purposes. Thank you for your participation.

\* Gerekli

1. Your age (in years) \*

2. Your gender: \*

*Yalnızca bir şıkkı işaretleyin.*

male

female

3. Specify the country and city you live in \*

4. What is the number of confirmed COVID-19 cases in your country so far? \*

5. What is the current number of cases who died of COVID 19 in your country? \*

6. What is the population of the city where you live? \*

*Yalnızca bir şıkkı işaretleyin.*

<10.000

10.000-100.000

100.000-1.000.000

>1.000.000

7. Please mark the appropriate answer for the health care center where you work. \*

*Yalnızca bir şıkkı işaretleyin.*

Primary care

Secondary care hospital

Tertiary care hospital

Diğer: \_\_\_\_\_

8. What is your occupation? \*

*Yalnızca bir şıkkı işaretleyin.*

MD

Nurse

Diğer: \_\_\_\_\_

9. What is your speciality?

---

---

---

---

---

10. How long have you been working in medical service? (years) \*

---

11. Please tick the appropriate box (you can tick multiple answers) \*

*Yalnızca bir şıkkı işaretleyin.*

I live alone at home

I live with my spouse

I live with my spouse and my children

There is a person over 60 years old in household

Diğer:  \_\_\_\_\_

12. Do you think you have enough knowledge about COVID-19? \*

*Yalnızca bir şıkkı işaretleyin.*

Yes

No

Unsure

13. Is there sufficient personal protective equipment to protect you from COVID 19 at your hospital? \*

*Yalnızca bir şıkkı işaretleyin.*

Yes

No

14. Is hand sanitizer or liquid soap sufficient in your hospital? \*

*Yalnızca bir şıkkı işaretleyin.*

Yes

No

15. Do you have a role in managing COVID-19? \*

*Yalnızca bir şıkkı işaretleyin.*

Yes

No

16. What is your role in managing patients with COVID19? (you can tick multiple answers) \*

*Çoklu şıkları birden işaretleyebilirsiniz.*

Clinician serving to patients with COVID19

Managerial role

Public-health management

Diagnostic issues

Clinician serving to patients with COVID19 in the ICU

Clinician serving to patients with COVID19 in the ward

Clinician serving to patients with COVID19 in the emergency department

Nurse serving to patients with COVID19 in the ICU

Nurse serving to patients with COVID19 in the ward

Nurse serving to patients with COVID19 in the emergency department

Diğer:

17. Please tick the appropriate box (you can tick multiple answers) \*

*Çoklu şıkları birden işaretleyebilirsiniz.*

|                                                           | Yes                      | No                       |
|-----------------------------------------------------------|--------------------------|--------------------------|
| Do you have a chronic illness?                            | <input type="checkbox"/> | <input type="checkbox"/> |
| Is there a drug that you use regularly?                   | <input type="checkbox"/> | <input type="checkbox"/> |
| Do you have a psychiatric illness?                        | <input type="checkbox"/> | <input type="checkbox"/> |
| Are there people with chronic diseases in your household? | <input type="checkbox"/> | <input type="checkbox"/> |

18. Do you think if you have taken enough precautions to prevent COVID transmission to yourself? \*

*Yalnızca bir şıkkı işaretleyin.*

Yes

No

Unsure

19. Below is a list of common symptoms of anxiety according to Beck Anxiety Scale. Please carefully read each item on the list. Indicate how much you have been bothered by that symptom during the past week, including today. \*

Beck Anxiety Scale Symptom Checklist

|                         | Not at all               | Mildly but it didn't bother me much | Moderately - it wasn't pleasant at times | Severely - it bothered me a lot |
|-------------------------|--------------------------|-------------------------------------|------------------------------------------|---------------------------------|
| Numbness or tingling    | <input type="checkbox"/> | <input type="checkbox"/>            | <input type="checkbox"/>                 | <input type="checkbox"/>        |
| Feeling hot             | <input type="checkbox"/> | <input type="checkbox"/>            | <input type="checkbox"/>                 | <input type="checkbox"/>        |
| Wobbliness in legs      | <input type="checkbox"/> | <input type="checkbox"/>            | <input type="checkbox"/>                 | <input type="checkbox"/>        |
| Unable to relax         | <input type="checkbox"/> | <input type="checkbox"/>            | <input type="checkbox"/>                 | <input type="checkbox"/>        |
| Fear of worst happening | <input type="checkbox"/> | <input type="checkbox"/>            | <input type="checkbox"/>                 | <input type="checkbox"/>        |
| Dizzy or lightheaded    | <input type="checkbox"/> | <input type="checkbox"/>            | <input type="checkbox"/>                 | <input type="checkbox"/>        |
| Heart pounding/racing   | <input type="checkbox"/> | <input type="checkbox"/>            | <input type="checkbox"/>                 | <input type="checkbox"/>        |
| Unsteady                | <input type="checkbox"/> | <input type="checkbox"/>            | <input type="checkbox"/>                 | <input type="checkbox"/>        |
| Terrified or afraid     | <input type="checkbox"/> | <input type="checkbox"/>            | <input type="checkbox"/>                 | <input type="checkbox"/>        |
| Nervous                 | <input type="checkbox"/> | <input type="checkbox"/>            | <input type="checkbox"/>                 | <input type="checkbox"/>        |
| Feeling of choking      | <input type="checkbox"/> | <input type="checkbox"/>            | <input type="checkbox"/>                 | <input type="checkbox"/>        |
| Hands trembling         | <input type="checkbox"/> | <input type="checkbox"/>            | <input type="checkbox"/>                 | <input type="checkbox"/>        |
| Shaky / unsteady        | <input type="checkbox"/> | <input type="checkbox"/>            | <input type="checkbox"/>                 | <input type="checkbox"/>        |
| Fear of losing control  | <input type="checkbox"/> | <input type="checkbox"/>            | <input type="checkbox"/>                 | <input type="checkbox"/>        |
| Difficulty in breathing | <input type="checkbox"/> | <input type="checkbox"/>            | <input type="checkbox"/>                 | <input type="checkbox"/>        |
| Fear of dying           | <input type="checkbox"/> | <input type="checkbox"/>            | <input type="checkbox"/>                 | <input type="checkbox"/>        |
| Scared                  | <input type="checkbox"/> | <input type="checkbox"/>            | <input type="checkbox"/>                 | <input type="checkbox"/>        |
| Indigestion             | <input type="checkbox"/> | <input type="checkbox"/>            | <input type="checkbox"/>                 | <input type="checkbox"/>        |
| Faint / lightheaded     | <input type="checkbox"/> | <input type="checkbox"/>            | <input type="checkbox"/>                 | <input type="checkbox"/>        |
| Face flushed            | <input type="checkbox"/> | <input type="checkbox"/>            | <input type="checkbox"/>                 | <input type="checkbox"/>        |
| Hot/cold sweats         | <input type="checkbox"/> | <input type="checkbox"/>            | <input type="checkbox"/>                 | <input type="checkbox"/>        |

Bu içerik Google tarafından oluşturulmamış veya onaylanmamıştır.

Google Formlar
